# Supplementary material for: miR-145 inhibits tumor growth and metastasis by targeting metadherin in high-grade serous ovarian carcinoma
Source: PubMed Central journal article supplement (PMC4279412; doi:10.18632/oncotarget.2522), 2014-10-23
Supplement: oncotarget-05-10816-s001.pdf [file oncotarget-05-10816-s001.pdf]

**SUPPLEMENTARY TABLES**

**Supplementary Table S1. HGSOC vs Fimbria 2.0 fold up regulated miRNAs**

**Supplementary Table S2. Main clinicopathological characteristics of patients enrolled in this study**

|                      | Serous ovarian carcinoma | Fimbria                         |
|----------------------|--------------------------|---------------------------------|
| Age (yrs)<br>Mean±SD | 58.8±9.5                 | 55.4±10.4                       |
| Median               | 59.5                     | 55                              |
| Range                | 41–76                    | 34–78                           |
| Case number          | Total 124                | Total 19                        |
|                      | Fresh tissues 48         | Benign changes of endometrium 4 |
|                      | Follow-up cohort 76      | leiomyoma 8                     |
|                      |                          | Benign tumors of ovary 5        |
|                      |                          | Endometrium ectopia 2           |

**Supplementary Table S3. Primers used in this study**

| Method       | Primer Name            | Primer sequence(5'—3')                     |
|--------------|------------------------|--------------------------------------------|
| Construction | GIPZ-puro- miR-145 (F) | CCTAGCGTAAAC CGCCAGAGGGTTTCCGGTACT         |
| Construction | GIPZ-puro- miR-145 (R) | GATCCGCTCGAG ACGGCAGTGCTGAAGTTCCCA         |
| Construction | MTDH 3'UTR-WT (F)      | GCATATGAGCTCGCTCCCTAATCCAGCCTGTC           |
| Construction | MTDH 3'UTR-WT (R)      | GCTCTAGACTGACAAAGTCCCTCCCCAC               |
| Construction | MTDH 3'UTR-MT 1(F)     | GTTTAGGGGTTTCTCCA GcagaacATCCTACCTATCTGTAC |
| Construction | MTDH 3'UTR-MT 1 (R)    | GTACAGATAGGTAGGATggtctgCTGGAGAAACCCCTAAAC  |
| Construction | MTDH 3'UTR-MT 2 (F)    | GTAAACTCACTGCACAGcagaacATTACTTTCCAAAAG     |
| Construction | MTDH 3'UTR-MT 2 (R)    | CTTTTGAAAGTAATggtctgTGTGCAGTGAGTTTAC       |
| qPCR         | miR-145(F)             | GTCCAGTTTTCCAGGAATCCCT                     |
| qPCR         | MTDH (F)               | AAATAGCCAGCCTATCAAGACTC                    |
| qPCR         | MTDH (R)               | TTCAGACTTGGTCTGTGAAGGAG                    |
| qPCR         | U6(F)                  | AACGCTTCACGAATTTGCGT                       |
| qPCR         | GAPDH (F)              | TGCACCACCAACTGCTTAGC                       |
| qPCR         | GAPDH (R)              | GGCATGGACTGTGGTCATGAG                      |
